1 **Infection Inspection: Using the power of citizen science to help with image-based prediction of**  
2 **antibiotic resistance in *Escherichia coli***

3  
4 Alison Farrar<sup>1,2,\*</sup>, Conor Feehily<sup>3,\*</sup>, Piers Turner<sup>1,2</sup>, Aleksander Zagajewski<sup>1,2</sup>, Stelios Chatzimichail<sup>1,2</sup>,  
5 Derrick Crook<sup>3,4</sup>, Monique Andersson<sup>4</sup>, Sarah Oakley<sup>4</sup>, Lucinda Barrett<sup>4</sup>, Hafez El Sayyed<sup>1,2</sup>, Philip W.  
6 Fowler<sup>3,5</sup>, Christoffer Nellåker<sup>6</sup>, Achillefs N. Kapanidis<sup>1,2</sup>, Nicole Stoesser<sup>3,4,5</sup>.

7  
8  
9 <sup>1</sup>Department of Physics, University of Oxford, Parks Road, Oxford, OX1 3PU, United Kingdom.

10 <sup>2</sup>Kavli Institute for Nanoscience Discovery, University of Oxford, South Parks Road, Oxford, OX1  
11 3QU, United Kingdom.

12 <sup>3</sup>Nuffield Department of Medicine, University of Oxford, John Radcliffe Hospital, Oxford, OX3 9DU,  
13 United Kingdom.

14 <sup>4</sup>Department of Microbiology and Infectious Diseases, Oxford University Hospitals NHS Foundation  
15 Trust, Oxford, OX3 9DU, United Kingdom.

16 <sup>5</sup>National Institute of Health Research Oxford Biomedical Research Centre, John Radcliffe Hospital,  
17 Oxford, OX3 9DU, United Kingdom.

18 <sup>6</sup>Nuffield Department of Women's & Reproductive Health, University of Oxford, Big Data Institute,  
19 Oxford, OX3 7LF, United Kingdom.

20 \*Authors contributed equally to the work.

21

22 **Abstract**

23 Antibiotic resistance is an urgent global health challenge, necessitating rapid diagnostic tools to  
24 combat its escalating threat. This study introduces innovative approaches for expedited bacterial  
25 antimicrobial resistance profiling, addressing the critical need for swift clinical responses. Between  
26 February and April 2023, we conducted the Infection Inspection project, a citizen science initiative in  
27 which the public could participate in advancing an antimicrobial susceptibility testing method based  
28 on single-cell images of cellular phenotypes in response to ciprofloxacin exposure. A total of 5,273  
29 users participated, classifying 1,045,199 images. Notably, aggregated user accuracy in image  
30 classification reached 66.8%, lower than our deep learning model's performance at 75.3%, but  
31 accuracy increased for both users and the model when ciprofloxacin treatment was greater than a  
32 strain's own minimum inhibitory concentration. We used the users' classifications to elucidate which  
33 visual features influence classification decisions, most importantly the degree of DNA compaction and  
34 heterogeneity. We paired our classification data with an image feature analysis which showed that  
35 most of the incorrect classifications were due to cellular features that varied from the expected  
36 response. This understanding informs ongoing efforts to enhance the robustness of our deep learning-  
37 based bacterial classifier and diagnostic methodology. Our successful engagement with the public  
38 through citizen science is another demonstration of the potential for collaborative efforts in scientific  
39 research, specifically increasing public awareness and advocacy on the pressing issue of antibiotic

**NOTE: This preprint reports new research that has not been certified by peer review and should not be used to guide clinical practice.**

40 resistance, and empowering individuals to actively contribute to the development of novel  
41 diagnostics.

42

### 43 **Lay summary**

44 Antibiotic resistance is a big health problem worldwide. We need fast ways to find out if bacteria are  
45 resistant to antibiotics. In our study, we develop new methods to do this quickly. We ran an online  
46 project called Infection Inspection from February to April 2023, in which 5,273 people took part.  
47 Together, they classified more than a million pictures of bacterial cells, helping our project use these  
48 pictures to detect antibiotic resistance. The volunteers performed well, getting near 67% of the  
49 answers right. We also learned which pictures helped or confused them. This will help us make our  
50 computer program better. This project didn't just help science; it also taught people about antibiotic  
51 resistance. Partnerships between the public and scientists can make a difference to developing  
52 technologies that protect our health.

53

### 54 **Introduction**

55 Antibiotic resistance is an escalating global health concern, necessitating the development of new  
56 technologies such as rapid tests for antibiotic-resistant bacteria to mitigate its impact. Rapid  
57 identification of which bacterial species is causing an infection and its resistance profile has been  
58 shown to both optimize antibiotic use and enhance patient outcomes<sup>1,2</sup>. Currently, typical diagnostic  
59 tests rely on time-consuming bacterial culture growth, taking a minimum of 12 to 48 hours to produce  
60 results. Alternative rapid tests focus on identifying resistance-associated genes, but these may not  
61 always directly correlate with phenotypic resistance<sup>3</sup>. Antibiotic resistance poses a significant threat  
62 to individual and public health by potentially rendering common antibiotics ineffective in treating  
63 bacterial infections, but public awareness of the use of antibiotics and the impact of antibiotic  
64 resistance remains incomplete<sup>4</sup>.

65

66 Citizen science collaborations between volunteers and research teams can play an important role in  
67 educating the public about scientific concepts and have been instrumental in recognizing complex  
68 patterns within biological data, starting with research in ecology and extending to various biological  
69 fields, including protein folding, DNA sequence alignment, electron microscopy, and microbiology<sup>5-7</sup>.  
70 These projects enable individuals of diverse backgrounds and expertise levels to contribute to  
71 scientific data collection and analysis, empowering them to actively advance and acquire knowledge  
72 in various disciplines. Public involvement broadens the spectrum of available data, perspectives, and  
73 ideas, leading to more comprehensive and innovative research outcomes. Successful examples, such

74 as the Great Backyard Bird Count and the Merlin Bird ID app<sup>8,9</sup>, demonstrate citizen science's potential  
75 to enable large-scale data collection and analysis, raise awareness, inspire future scientists, and  
76 promote environmental and civic responsibility.

77

78 The public can be effectively engaged in citizen science projects using various strategies, including  
79 hosting events, utilizing social media platforms, partnering with educational institutions and  
80 community organizations, and offering training and educational resources, but most of these  
81 approaches engage only 10s-100s of individuals. Online platforms which simplify access for large-  
82 scale, global public engagement in targeted or diverse citizen science projects include Zooniverse<sup>10,11</sup>,  
83 SciStarter<sup>12</sup>, and Foldit<sup>13</sup> amongst others<sup>14</sup>. For participants, Zooniverse offers a unique and engaging  
84 way to learn about science, participate in real research, and connect with like-minded individuals<sup>15</sup>.

85

86 A previous project hosted on Zooniverse, Bash the Bug<sup>7</sup>, successfully engaged citizen scientists to look  
87 at images of bacterial growth and identify their resistance to antimicrobial drugs. This demonstrated  
88 how citizen science can be used for antimicrobial resistance research and the development of novel  
89 diagnostic tools. We are developing a diagnostic method that relies on a microfluidic device for the  
90 direct capture and identification of bacteria and associated antibiotic resistance from clinical samples  
91 using microscopy. We recently developed a deep-learning model which can classify individual *E. coli*  
92 cells as ciprofloxacin-sensitive or resistant with 80% accuracy (which results in high-confidence  
93 classifications of populations of bacteria) based on morphological changes to the sub-cellular  
94 structure<sup>16</sup>. The continued development of these single-cell, imaging-based classification methods  
95 requires robustness to bacterial heterogeneity, and an understanding of why certain cells within a  
96 sample are misclassified is essential. We therefore developed a project on Zooniverse called Infection  
97 Inspection to leverage the power of citizen scientists towards optimising our novel method, and to  
98 engage the public in an antibiotic resistance-focused project. We first trained volunteers to recognize  
99 cellular phenotypes associated with ciprofloxacin-sensitive and ciprofloxacin-resistant *E. coli*, and then  
100 used their classifications to learn what features facilitate accurate classification, and which lead to  
101 ambiguity and misclassifications. Our aim was to use their classifications and misclassifications to  
102 make our machine learning-based bacterial classifier more robust to atypical phenotypes, whilst  
103 simultaneously educating the citizen scientists about antibiotic resistance.

104

## 105 **Methods**

### 106 **Image dataset**

107 The project dataset was made up of 49,074 individual images of ciprofloxacin-treated *E. coli* cells  
108 generated for previous work<sup>16</sup>. All bacteria had been chemically fixed and stained using 4',6-

109 diamidino-2-phenylindole (DAPI) as the nucleic acid stain and Nile Red as the membrane stain. The  
110 initial dataset was composed of 11,074 256x256 Red-Green-Blue (RGB) images of *E. coli* cells from 5  
111 clinical strains (EC1, EC2, EC3, EC5, and EC6, reported previously<sup>16</sup>) treated at 10 mg/L for 30 minutes,  
112 with clinical strains defined as ciprofloxacin-resistant (minimum inhibitory concentration [MIC]  
113 >0.5mg/L) or ciprofloxacin sensitive (MIC ≤0.25 mg/L) using European Union Council on Antimicrobial  
114 Susceptibility Testing (EUCAST) breakpoints<sup>17</sup> . A second dataset of 38,000 images included the same  
115 *E. coli* strains treated at 9 concentrations ranging from 16 mg/L to 0.001 mg/L ciprofloxacin for 30  
116 minutes. All bacteria were imaged in an automated workflow as agarose-mounted samples in  
117 phosphate buffered saline (PBS) on a Nanoimager-S fluorescence microscope (Oxford Nanoimaging)  
118 using the multiple acquisition capability of the microscope with autofocusing on each field of view.  
119 The image segmentation for background removal was done with an optimised model of Mask-RCNN  
120 adapted from a standard implementation<sup>18,19</sup>.

121

#### 122 **Development of Infection Inspection with the Zooniverse project builder workflow**

123 Infection Inspection was designed as a citizen science project on the Zooniverse platform  
124 (<https://www.zooniverse.org/>) using the Project Builder (<https://zooniverse.org/lab>), a free-to-use  
125 web browser application enabling research teams to build and contribute projects to the site. During  
126 the building process, we developed an initial workflow, tutorial, and project field guide. Datasets were  
127 added to the project as .png images using the Subject Set upload tool within the Zooniverse Project  
128 Builder.

129

130 Infection Inspection was submitted for internal review in August 2022 and went to beta reviewers in  
131 September 2022. In response to beta feedback, we improved our project terminology, added  
132 explanations to the field guide and instructions for how to classify ambiguous or unusual cells.

133 During the beta test, we noticed that user accuracy did not improve with the number of classifications  
134 done. To help users learn from their own misclassifications, we implemented user feedback for a set  
135 of 30 tutorial images. These images had a ground truth classification of “Sensitive,” “Resistant,” or  
136 “Image Processing Error” and users would receive feedback on their accuracy immediately after  
137 submitting a classification for one of these images. Tutorial images were shown to users with  
138 decreasing probability: 0.5 for the first 5-10 subjects, declining to 0.25 by 20 subjects, and 0.05 after  
139 50 subjects. The retirement limit was set to 20, meaning that each image was considered complete  
140 once it was classified by 20 unique volunteers.

141

142 The tutorial and field guides were written in line with guidance on communicating with the public on  
143 antibiotic resistance from the Wellcome Trust<sup>20</sup>. We solicited and implemented feedback from non-

144 experts, public engagement experts, and a secondary school biology teacher on the language used in  
145 the project before submitting for beta testing.

146

### 147 **Accuracy and participation analysis**

148 On completion of the project on 10<sup>th</sup> May 2023, the project data file which included all classifications  
149 was downloaded in .csv format from the Zooniverse site. Only classifications performed from go-live  
150 (7<sup>th</sup> Feb 2023 17:40 UTC) to full dataset completion (10 May 2023 21:40 UTC) were included in the  
151 analysis. Image identifiers were matched back to the original strain and metadata including known  
152 MIC, treatment concentration, clinical antibiotic susceptibility phenotype, and predicted  
153 classifications were assigned to each data point. The predicted classification was defined as the  
154 expected response of the strain for the antibiotic. For instance, if the MIC for a particular strain was  
155 0.03 mg/L and the treatment concentration was 10 mg/L, that strain was categorized as susceptible.  
156 Conversely, if the MIC was 72 mg/L and the treatment concentration was 10 mg/L, the strain was  
157 labelled as resistant. All usernames were anonymised to 'User\_1, \_2, etc'. For the accuracy  
158 determination, any classifications of images that were part of the training/feedback dataset or  
159 classifications of "Image processing error" were removed. Summary statistics were performed in R (v  
160 4.2.3) using the R package vegan (v 2.6-4) and plotted with ggplot2 (v 3.4.4). Accuracy was graded as  
161 whether the user's classification matched the image's predicted classification as defined above.

162 We used the Gini coefficient to characterise the extent of inequality in the distribution of  
163 classifications by volunteers. The Gini coefficient derives from a metric for income inequality<sup>21</sup> and has  
164 been applied to measure inequality in volunteer contributions previously<sup>15</sup>. We calculated the Gini  
165 coefficient with the following formula:

$$166 \quad 1 - \left( 2 \times \frac{\sum(\text{proportion of total classifications})}{\text{total users}} \right).$$

167

### 168 **Image feature analysis**

169 CellProfiler<sup>22</sup> was used to extract image features from the dataset. The RGB .tif images were split into  
170 grayscale single-color images using the ColorToGray module. Then, the IdentifyPrimaryObjects  
171 module was used with default settings to identify the Membrane object from the red channel. For the  
172 Nucleoid object, two-class Otsu thresholding was used with default settings because it segmented  
173 diffuse nucleoid regions more accurately. Intensity measurements for each object were measured  
174 using the MeasureObjectIntensity module. Size and shape measurements were extracted using the  
175 MeasureObjectSizeShape module. All measurement data were exported using CellProfiler to an SQLite  
176 database<sup>23</sup> and selected measurements were converted to .csv files with DB Browser for SQLite  
177 (version 3.12.2).

178

179 Further image feature analysis was completed in Python and R scripts, available at  
180 <https://github.com/KapanidisLab>. Images were excluded from analysis if more than half of their  
181 classifications were “Image Processing Error.” An accuracy threshold of 0.5 was chosen to compare  
182 images that were most frequently classified correctly or incorrectly. For example, if a cell’s predicted  
183 classification was Sensitive, based on its MIC and the treatment concentration, and it was classified as  
184 Sensitive by more than 50% of users, it would be labelled as Correct Sensitive. A cell from the same  
185 strain and treatment condition that was classified as Resistant by more than 50% of users would be  
186 labelled as Incorrect Sensitive. This yielded four sets of images whose features could be compared:  
187 Correct Sensitive, Correct Resistant, Incorrect Sensitive, and Incorrect Resistant. Images were called  
188 Most Correct if they were classified correctly with a ratio greater than 0.94, corresponding to roughly  
189 19 correct classifications of 20.

190

191 For feature comparisons between groups of cells displaying ciprofloxacin-resistant or susceptible  
192 phenotypes, we performed two-sided *t*-tests with Bonferroni corrections for multiple comparisons  
193 using the `ggpubr` (version 0.6.0) and `Rstatix` (version 0.7.2) packages. We compared the distributions  
194 of the values associated with cellular phenotypic features to a normally distributed Random Noise  
195 feature generated by `numpy.random.normal`<sup>24</sup>. A principal component analysis with 2 principal  
196 components was performed using the 7 measured image features and the Scikit-learn PCA function<sup>25</sup>.  
197 Before analysis, all feature measurements were normalised with Standard Scaler from Scikit-learn<sup>25</sup>.  
198 For the dataset with multiple ciprofloxacin concentrations, the principal component analysis with 2  
199 principal components was performed in R with the `prcomp` function from the `stats` library (version  
200 4.1.3) and plotted with `ggplot2` (version 3.4.3).

201

202 Independently, we extracted the feature importance values from a Random Forest classifier with 100  
203 trees and a minimum of 3 samples per leaf that had been trained using Scikit-learn<sup>25</sup> on images that  
204 were randomly allocated to a 75-25 train-test split and then scaled with Standard Scaler. The Random  
205 Forest classifier was evaluated by cross-validation by the Mean Absolute Error and was then applied  
206 to the test dataset to make predictions.

207

208 For each image, we calculated SHAP (SHapley Additive exPlanation) values for each feature using  
209 Kernel SHAP, a model agnostic implementation for Python<sup>26</sup>. This method, which derives from game  
210 theory approaches, measures an importance value for each feature for each image classification, and  
211 has been shown to correspond well to intuitive human feature impact estimates<sup>26</sup>.

212

## 213 **Results**

### 214 **The Infection Inspection project engaged a large cohort of users**

215 Infection Inspection was launched on the Zooniverse platform on the 7<sup>th</sup> of February 2023 (Fig. 1a)  
216 and was promoted via multiple platforms, including webpages, print magazines, in-person outreach  
217 events, and emails for Zooniverse users. An initial dataset comprising of 30 training and 5,000 test  
218 images was available to users and completed within just 18 hours. A second dataset of 6,074 images  
219 was subsequently uploaded and completed in 72 hours, whilst a final dataset of 38,000 images was  
220 uploaded and completed in 35 days (840 hours). A total of 5,273 unique users performed at least one  
221 image classification and overall 1,045,199 classifications were made between the project launch date  
222 and May 10<sup>th</sup>, 2023. After removing classifications of the training dataset, a total of 4,927 users  
223 remained, covering 1,003,588 classifications (Fig. 1b). The median number of classifications performed  
224 by users was 38, however the variation in number of classifications per user was large, with 56 users  
225 performing >2,000 individual classifications. The maximum classifications undertaken by any given  
226 user was 46,289.

227

228 Engagement with the project correlated with the upload of new data, with spikes in classifications  
229 occurring within 1-2 days after upload (Fig. 1c). Amongst the 20 most engaged users, return to the  
230 project was common, with these users returning to the project on several occasions throughout (Fig.  
231 1d). The Gini coefficient for our user participation was 0.81, which means that the most prolific  
232 volunteers contributed a large proportion of our project's classifications, or our project attracted  
233 many casual users, or both. The Gini coefficient for Infection Inspection is close to the mean Gini  
234 coefficients of the most popular ecology (0.80), astronomy (0.82), and transcription (0.81) projects on  
235 Zooniverse and higher than the average Biomed project score of 0.67 based on a previous analysis<sup>15</sup>.

236

### 237 **Volunteers classified *E. coli* cellular phenotypes with accuracy comparable to deep learning**

238 We assessed the accuracy of user classifications in distinguishing bacteria as either ciprofloxacin-  
239 resistant or susceptible, based on the ciprofloxacin treatment concentration relative to the Minimum  
240 Inhibitory Concentration (MIC) for each strain. When we aggregated the data from all three dataset  
241 uploads, users achieved an accuracy of 66.4% in classifying susceptible cells (Fig. 2a). The accuracy for  
242 classifying resistant cells was similar, standing at 67.3% (Fig.2a). We also employed the same images  
243 to test a deep-learning model<sup>16</sup>. Compared to the volunteers, the model was less accurate in  
244 classifying resistant cells (62.5%; Fig. 2a), but more accurate in classifying susceptible cells (88.2%).

245

246 Given that the number of classifications performed by users varied, we examined whether there was  
247 a correlation between accuracy and the total number of images classified. Despite having ten users  
248 who classified >10,000 images, we observed no significant relationship between accuracy and the total  
249 number of images classified (Fig. S1a). Additionally, the duration of user activity on the project did not  
250 influence classification accuracy (Fig. S1b).

251

### 252 **Classification accuracy depended on the antibiotic concentration used for treatment**

253 In the third dataset uploaded, we introduced cells treated at varying concentrations of ciprofloxacin;  
254 some of the concentrations used were below the MIC, and thus we expected to see no significant  
255 phenotypic changes; on the other hand, some of the concentrations were above the MIC, and should  
256 produce phenotypic changes. These treatments allowed us to investigate whether both users and our  
257 deep learning model could detect changes in cell structure based on a graduated treatment  
258 concentration. For one of the strains (EC1), users correctly classified the cellular changes close to 75%  
259 of the time for all treatment concentrations except the one closest to the known MIC of the strain  
260 (Fig. 2b). At this specific treatment concentration (0.01 mg/L), accuracy in identifying the response  
261 dropped to nearly 25%. A similar trend was observed in the model's predictions. While accuracy was  
262 highest at treatment concentrations of 0.1 mg/L and above, the greatest confusion was encountered  
263 when the treatment concentration approached the MIC of the strain (Fig. 2b). This pattern of  
264 increased confusion was also observed for the second strain (EC3), which had a different MIC (0.5  
265 mg/L).

266

### 267 **Differences in DNA morphology leads to the most confusion in correctly classifying images**

268 Some images were more frequently misclassified than others. In the first uploaded dataset of 3,015  
269 ciprofloxacin-sensitive and 3,212 ciprofloxacin-resistant cells treated at 10 mg/L, the classification  
270 accuracy histograms are left-skewed, with many images almost always classified correctly, and others  
271 almost never (Fig. 3). This suggested that, while many cells displayed the expected cellular phenotype  
272 when exposed to ciprofloxacin, there were sub-populations with atypical features.

273

274 For this specific analysis, images were assigned to the "Incorrect" class if they were classified with less  
275 than 50% accuracy, and otherwise to the "Correct" class. Cells were excluded from the image feature  
276 analysis if they labelled as an "Image Processing Error" by more than half of the users who classified  
277 the image; this removed 230 images.

278



279 To explore why some cells were more frequently misclassified than others, human-interpretable  
280 image features were measured with CellProfiler<sup>27</sup>. Seven features were chosen for their potential  
281 biological relevance to the ciprofloxacin response (Fig. S2). To characterize the compaction,  
282 heterogeneity, and quantity of DNA, we measured the number of DNA regions per cell, the mean and  
283 standard deviation of the integrated intensity of the DNA regions, the mean standard deviation of the  
284 DNA intensity, and the area fraction occupied by the nucleoid regions. The cell shape was described  
285 by the form factor of the membrane and the major axis length was used to measure the cell size.

286

287 The image features of susceptible and resistant cells that were most often classified correctly were all  
288 significantly different (Corrected  $t$ -test  $p < 0.001$ ) (Fig. S2). However, when comparing the features of  
289 cells that were most frequently classified incorrectly, there was no significant difference in the mean  
290 integrated intensity of the DNA regions ( $p=1$ ), the mean standard deviation of intensity of the DNA  
291 regions ( $p=0.34$ ), and Nucleoid Area Fraction ( $p=1$ ) between sensitive and resistant bacteria (Fig. 4),  
292 consistent with the images of these cells having features that are too similar to distinguish.

293

#### 294 **Images classified correctly and incorrectly cluster separately with distinct feature properties**

295 To understand the cellular phenotypes represented by our image features, a principal component  
296 analysis was performed. The principal component analysis allowed us to visualise the phenotypic  
297 variance in our image dataset by projecting the feature measurements of each cell into a 2-  
298 dimensional space such that images with more similar features would cluster together. In addition,  
299 the loading vectors of each feature revealed the magnitude of its contribution to the ciprofloxacin-  
300 sensitive and ciprofloxacin-resistant phenotypes.

301

302 The variation in the first principal component was primarily driven by the number of DNA regions, the  
303 standard deviation of the integrated intensity of the DNA regions, and the cell major axis length; the  
304 second principal component was driven by the nucleoid area fraction and the mean integrated  
305 intensity of the nucleoid (Fig. 5). Images of susceptible or resistant bacteria that were in the correct  
306 class clustered separately, with some overlap, while images in the incorrect class clustered in the  
307 centre, with greater variation in the second principal component. This suggested that images that are  
308 frequently classified incorrectly have intermediate phenotypes, with DNA regions and cell lengths that  
309 were not clearly demonstrating signs of ciprofloxacin-resistance or sensitivity.

310

311 For images where there was greater than 94% accuracy in classification ("Most Correct"), there was a  
312 distinct clustering observed with less overlap to the remaining correct images (Fig.S3). This highlighted

313 that images are more likely to be consistently classified correctly when they exhibit features that  
314 distinguish them well from the opposite class.

315

### 316 **Ciprofloxacin sensitive and resistant cells portray different features of importance with** 317 **respect to correct classification**

318 We investigated which features might be most influential for classification (either by volunteers or a  
319 machine learning model) by computing SHAP contributions (SHapley Additive exPlanations)<sup>26</sup>. For the  
320 SHAP analysis, a Random Forest classifier was trained to classify images from our dataset as  
321 susceptible or resistant using our image feature measurements. An additional feature of normally  
322 distributed random numbers was added to determine which features held significance greater than  
323 random noise. This model achieved a Mean Absolute Error of 0.15 (accuracy = 85%) on a holdout  
324 dataset. The trained Random Forest model was then used to compute SHAP feature contribution  
325 scores for each image in the test holdout dataset. The average importance of a feature can be  
326 measured by the mean absolute value of the SHAP contribution for all images in the dataset.

327

328 Using this approach, and when looking at the entire dataset of susceptible and resistant images, the  
329 most important features were the DNA mean standard deviation of intensity (median SHAP=0.109,  
330  $p < 0.0001$ ), number of DNA regions (median SHAP=0.085,  $p < 0.0001$ ), and nucleoid area fraction  
331 (median SHAP=0.081,  $p < 0.0001$ ) (Fig.6). All of the measured features contributed more to the  
332 classification task than the normally distributed random noise ( $p < 0.0001$ ).

333

### 334 **Different phenotypes develop in resistant bacteria treated with high concentrations of** 335 **ciprofloxacin**

336 In addition to the stark phenotypic differences between ciprofloxacin-treated susceptible and  
337 resistant bacteria treated at the same antibiotic concentration, our titration dataset revealed that an  
338 *E. coli* strain (EC3) with moderate resistance (MIC 0.5 mg/l) showed different features when treated  
339 at 8-, 16-, and 32-times the MIC (4, 8, and 16 mg/L, respectively) for 30 minutes compared to 2- and  
340 4-times MIC (1 and 2 mg/l, respectively) (Fig. S4). This matched the trend in classification accuracy for  
341 EC3 at these concentrations (Fig. 2b).

342

## 343 **Discussion**

344 The Infection Inspection project showed that misclassifications of ciprofloxacin-sensitive and  
345 ciprofloxacin-resistant *E. coli* are associated with diversity in the appearance of the bacterial DNA after  
346 antibiotic treatment. Ciprofloxacin is a fluoroquinolone antibiotic that inhibits the enzymes involved  
347 in bacterial DNA replication and repair<sup>28</sup>. In susceptible bacteria this can result in the compaction of  
348 the DNA and the inability to separate to dividing cells. Whilst our previously reported computer model

349 could achieve a classification accuracy as high as 80%<sup>16</sup> there remains a degree of confusion with  
350 respect to certain images, especially near the minimum inhibitory concentration of the strain (Fig. 2b).  
351 By image feature analysis, we found that images most likely to be classified incorrectly did not show  
352 the phenotypic features of correctly classified ciprofloxacin-susceptible or resistant cells, indicating  
353 that these bacteria develop ambiguous or intermediate phenotypes.

354  
355 We used a feature analysis and computed SHAP contribution scores to determine that DNA mean  
356 standard deviation of intensity, the nucleoid area fraction, and the number of DNA regions were the  
357 most important features when deciding how to classify an image. This means that the degree of DNA  
358 compaction and heterogeneity, and the space it occupies within the cell, are the key features that can  
359 be used to determine whether an *E. coli* bacterium is responding to ciprofloxacin treatment.

360  
361 The successful participation of the public with Infection Inspection and the speed at which users  
362 classified the images highlights the interest in and value of the public in tackling the problem of  
363 antimicrobial resistance. It is clear that citizen science platforms like the Zooniverse provide a valuable  
364 resource for recruiting large groups of the public to engage with research <sup>5,6</sup>.

365  
366 Our project demonstrates the utility of citizen science volunteers in interpreting large biomedical  
367 datasets. Biomedical projects are a minority on the Zooniverse platform. A 2019 study showed only 3  
368 biomedical projects of 63 projects surveyed (5%)<sup>15</sup> were included on the platform; as of November 13,  
369 2023, this fraction remained low, with only 5/100 (5%) of active projects in a biomedical discipline.  
370 The Gini coefficient is a measure of inequality that has been used to assess the degree to which many  
371 casual volunteers and some super-users contribute to the shared work of Zooniverse projects. On  
372 average, biomedical projects were found to have a notably lower average Gini coefficient than  
373 astronomy projects, which could be the result of fewer return volunteers, or because biomedical  
374 projects more successfully attract many casual contributors<sup>15</sup>. Infection Inspection attracted 3,137  
375 volunteers while it was active, with a Gini coefficient of 0.81, higher than the average biomedical  
376 project studied. We speculate that our single-step, fast workflow encouraged more classifications than  
377 the average biomedical research project.

378  
379 Despite its successes, the Infection Inspection project had limitations. It relied on voluntary  
380 contributions from citizen scientists, which introduced variability in data quality and quantity. We had  
381 no information on the users participating in the study, and no quantitative feedback on the impact of  
382 our tutorials on informing the public about AMR. The study focused on a single antibiotic and cells

383 obtained from a small number of bacterial strains, limiting the generalizability of findings to other  
384 antibiotics and pathogens. Since the workflow was limited to a single classification step, information  
385 about the volunteer's decision-making process was lost.

386

387 Looking ahead, citizen scientists can continue to play a pivotal role in our research and in addressing  
388 global health challenges related to antibiotic resistance. Future engagements could involve exploring  
389 dynamic responses of bacterial cells to antibiotics, expanding the scope to cover a broader range of  
390 antibiotics and conditions, improving training materials and guidelines, raising public awareness, and  
391 integrating an assessment of the impact of these tools on user education about the scientific topics  
392 being studied. On the project discussion board, some volunteers started discussions about images that  
393 appeared to be cells in the process of cell division or images that looked unusual. While the project  
394 was not designed to classify images in such detail, it is encouraging to realise that that users could be  
395 asked to consider stages of cell growth in a future task. Our project, and other researchers working  
396 with citizen scientists, can take advantage of this scientific intuition in understanding their datasets.

397

398 In conclusion, the Infection Inspection project exemplifies the potential of citizen science platforms to  
399 engage the public in scientific research, enhance the analysis of large datasets, and contribute to our  
400 understanding of complex issues like antibiotic resistance. The collaboration between citizen scientists  
401 and researchers not only advances scientific methodologies but also fosters a sense of shared  
402 responsibility in addressing global health challenges. Despite its limitations, this project has opened  
403 doors to further exploration and collaboration, highlighting the promising role of citizen science in the  
404 future of biomedical research and public health.

405

#### 406 **Acknowledgements**

407 The Zooniverse Volunteer Community: This publication was made possible by the contributions of  
408 volunteers in the Infection Inspection project. We thank them all for their dedication and engagement  
409 with the project. We would also like to thank the Zooniverse platform leaders, Helen Spiers, Mary  
410 Westwood, and Cliff Johnson. This work was supported by the Oxford Martin School (by the  
411 establishment of the Oxford Martin School Programme on Antimicrobial Resistance Testing; to A.N.K.,  
412 N.S., C.N., D.C. and M.A.), by Wellcome Trust grant 110164/Z/15/Z (to A.N.K.), by the Clarendon Fund  
413 Scholarships (to A.F.), and by UK Biotechnology and Biological Sciences Research Council grants  
414 BB/N018656/1 and BB/S008896/1 (to A.N.K.). The research was additionally supported by the  
415 National Institute for Health Research (NIHR) Health Protection Research Unit in Healthcare  
416 Associated Infections and Antimicrobial Resistance (NIHR200915) at the University of Oxford in

417 partnership with United Kingdom Health Security Agency (UKHSA) and by the NIHR Oxford Biomedical  
418 Research Centre. N.S. is an NIHR Oxford BRC Senior Research Fellow.

419

#### 420 **Data availability**

421 The raw data images used to build this project are available from the Oxford University Research  
422 Archive: <https://ora.ox.ac.uk/objects/uuid:12153432-e8b3-4398-a395-abfb980bd84e>. The individual  
423 segmented single cell images and classification metadata are available at:  
424 <https://zenodo.org/doi/10.5281/zenodo.10301352>.

425

#### 426 **Conflict of interest**

427 The original image data were obtained using a wide-field microscope from Oxford Nanoimaging, a  
428 company in which A.N.K. is a co-founder and shareholder. The other authors declare no competing  
429 interests.

430

#### 431 **Bibliography**

- 432 1. Van Heuverswyn, J. *et al.* Association between time to appropriate antimicrobial treatment and 30-day mortality in patients with bloodstream infections: a retrospective cohort study. *Clinical Infectious Diseases* **76**, 469–478 (2023).
- 433  
434
- 435 2. Barenfanger, J., Drake, C. & Kacich, G. Clinical and financial benefits of rapid bacterial  
436 identification and antimicrobial susceptibility testing. *J Clin Microbiol* **37**, 1415–1418 (1999).
- 437 3. van Belkum, A. *et al.* Developmental roadmap for antimicrobial susceptibility testing systems.  
438 *Nat Rev Microbiol* **17**, 51–62 (2019).
- 439 4. McNulty, C., Read, B., Quigley, A., Verlander, N. Q. & Lecky, D. M. What the public in England  
440 know about antibiotic use and resistance in 2020: A face-to-face questionnaire survey. *BMJ  
441 Open* **12**, e055464 (2022).
- 442 5. Spiers, H. *et al.* Deep learning for automatic segmentation of the nuclear envelope in electron  
443 microscopy data, trained with volunteer segmentations. *Traffic* **22**, 240–253 (2021).
- 444 6. Cooper, S. *et al.* Predicting protein structures with a multiplayer online game. *Nature* **466**,  
445 756–760 (2010).
- 446 7. Fowler, P. W. *et al.* A crowd of BashTheBug volunteers reproducibly and accurately measure  
447 the minimum inhibitory concentrations of 13 antitubercular drugs from photographs of 96-  
448 well broth microdilution plates. *Elife* **11**, e75046 (2022).
- 449 8. The Cornell Lab. Merlin Bird ID. <https://merlin.allaboutbirds.org/> (2023).
- 450 9. Van Vliet, K. & Moore, C. Citizen science initiatives: engaging the public and demystifying  
451 science. *J Microbiol Biol Educ* **17**, 13–16 (2016).
- 452 10. Zooniverse. The Zooniverse Community. [zooniverse.org](https://zooniverse.org) (2023).

- 453 11. Woodcock, J. *et al.* Crowdsourcing citizen science: exploring the tensions between paid  
454 professionals and users. *Journal of Peer Production* (2017).
- 455 12. Hoffman, C., Cooper, C. B., Kennedy, E. B., Farooque, M. & Cavalier, D. Scistarter 2.0: A digital  
456 platform to foster and study sustained engagement in citizen science. in *Analyzing the role of*  
457 *citizen science in modern research* 50–61 (IGI Global, 2017).
- 458 13. Miller, J. A., Khatib, F., Hammond, H., Cooper, S. & Horowitz, S. Introducing Foldit education  
459 mode. *Nat Struct Mol Biol* **27**, 769–770 (2020).
- 460 14. Liu, H.-Y., Dörler, D., Heigl, F. & Grossberndt, S. Citizen science platforms. *The Science of*  
461 *Citizen Science* **22**, 439–459 (2021).
- 462 15. Spiers, H. *et al.* Everyone counts? Design considerations in online citizen science. *Journal of*  
463 *Science Communication* **18**, A04 (2019).
- 464 16. Zagajewski, A. *et al.* Deep learning and single-cell phenotyping for rapid antimicrobial  
465 susceptibility detection in *Escherichia coli*. *Commun Biol* **6**, 1164 (2023).
- 466 17. The European Committee on Antimicrobial Susceptibility Testing. Breakpoint tables for  
467 interpretation of MICs and zone diameters. Version 13.1, 2023. <http://www.eucast.org>.  
468 (2023).
- 469 18. He, K., Gkioxari, G., Dollár, P. & Girshick, R. Mask r-cnn. in *Proceedings of the IEEE*  
470 *international conference on computer vision* 2961–2969 (2017).
- 471 19. Waleed Abdulla. Mask R-CNN for object detection and instance segmentation on Keras and  
472 TensorFlow. [https://github.com/matterport/Mask\\_RCNN](https://github.com/matterport/Mask_RCNN) (2017).
- 473 20. Wellcome Trust. *Reframing Resistance*. (2019).
- 474 21. Gastwirth, J. L. The estimation of the Lorenz curve and Gini index. *Rev Econ Stat* 306–316  
475 (1972).
- 476 22. Carpenter, A. E. *et al.* CellProfiler: image analysis software for identifying and quantifying cell  
477 phenotypes. *Genome Biol* **7**, 1–11 (2006).
- 478 23. Piacentini, M. About SQLite. <https://sqlitebrowser.org/about/>.
- 479 24. Harris, C. R. *et al.* Array programming with NumPy. *Nature* **585**, 357–362 (2020).
- 480 25. Pedregosa, F. *et al.* Scikit-learn: Machine learning in python. *Journal of Machine Learning*  
481 *Research* **12**, 2825–2830 (2011).
- 482 26. Lundberg, S. M. & Lee, S.-I. A Unified Approach to Interpreting Model Predictions. in vol. 30  
483 (Curran Associates, Inc., 2017).
- 484 27. Stirling, D. R. *et al.* CellProfiler 4: improvements in speed, utility and usability. *BMC*  
485 *Bioinformatics* **22**, 1–11 (2021).
- 486 28. Fisher, L. M. *et al.* Ciprofloxacin and the fluoroquinolones: new concepts on the mechanism  
487 of action and resistance. *Am J Med* **87**, S2–S8 (1989).

488  
489

490

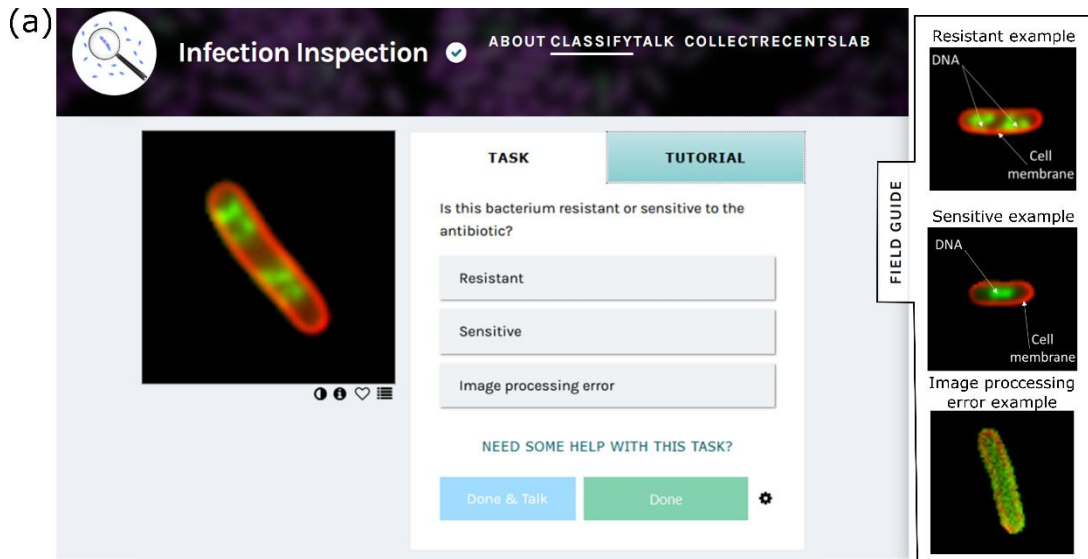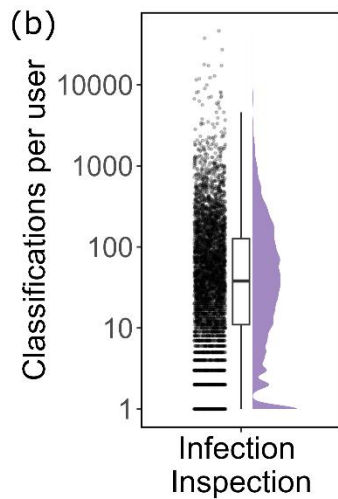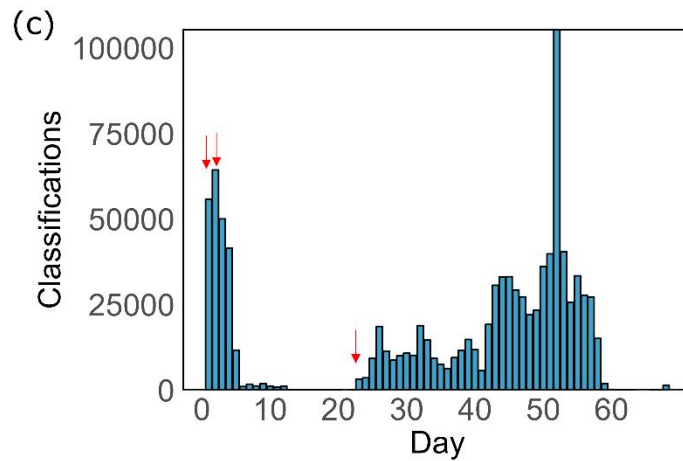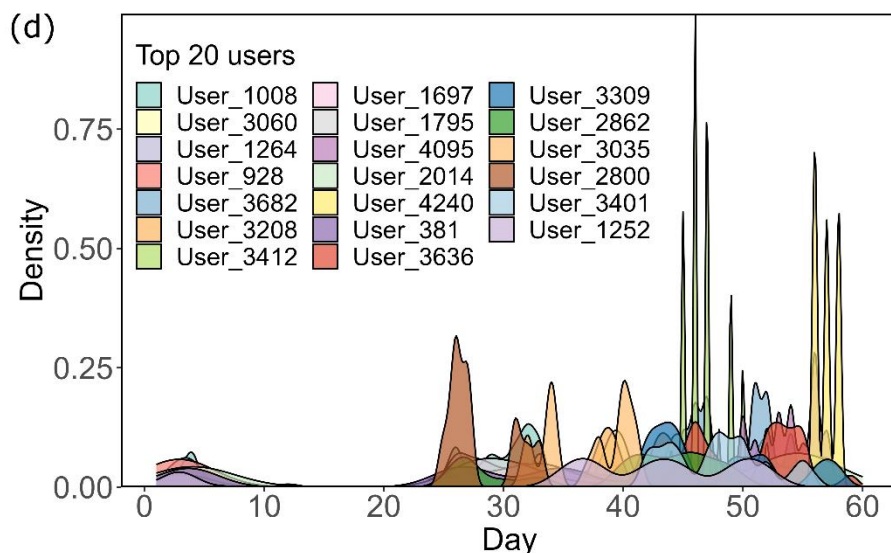

491

492 **Figure 1. Engagement of users with Infection Inspection.** (a) Task page for users of Infection

493 Inspection. Users were presented with an image of a bacterial cell and were asked to select from one

494 of three options to classify the image. Accessing the field guide provided examples of each cell type

495 as exemplified in the subset panel (b) Distribution of the number of classifications by user (n=5273 users,  
 496 n=1,045,199 classifications). Each dot represents an individual user that performed a classification on  
 497 at least 1 non-training set image. The box represents the middle 50% (IQR) of the users and mid-line  
 498 indicates the median number of classifications. (c) The distribution of classifications performed on  
 499 each day of the project. Red arrows indicate the time of each data batch upload. (d) Density mapping  
 500 of activity for each of the top 20 users (by number of classifications) over the course of the project  
 501 highlighting the differences in patterns of contribution. Day 1 on the x-axis represents the first day  
 502 that the user engaged with the project.

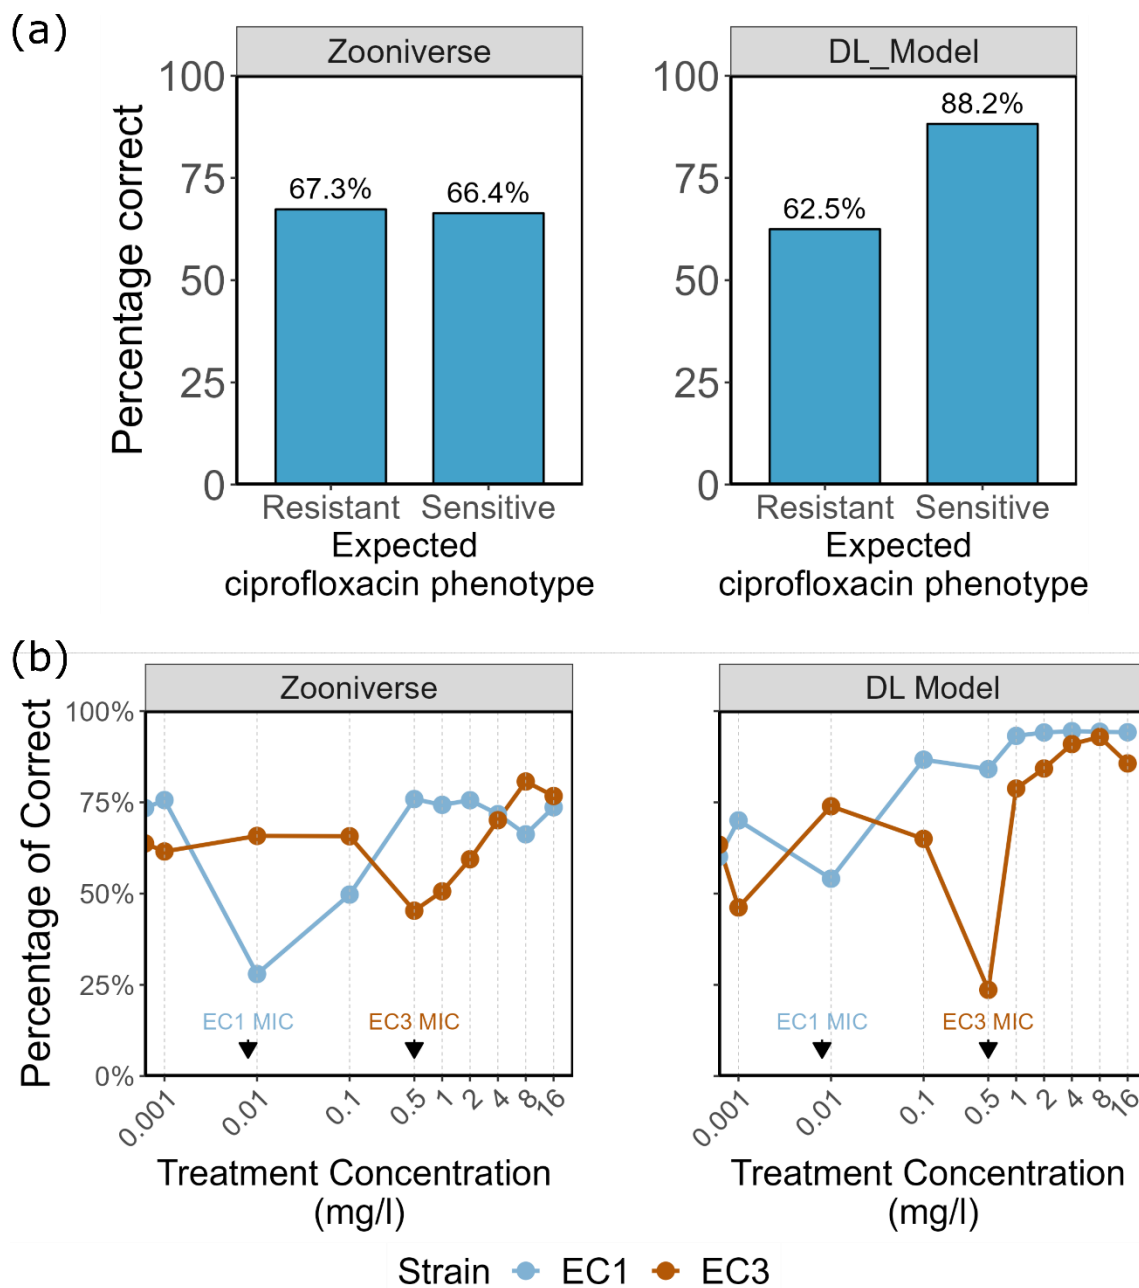

503  
 504



505 **Figure 2. Classifications of images by Infection Inspection users.** (a) An aggregated plot of how  
506 accurate users or model were at categorising an image into either the resistant or sensitive category  
507 based on the expected phenotype for the given sample. DL model denotes the deep learning model  
508 applied. (b) The line plots visualise the percentage of images that were correctly categorised as either  
509 resistant or susceptible as expected based on the treatment concentration, by the users or model.  
510 Each subplot shows the data for a different *E. coli* strain with the treatment concentration on the x-  
511 axis. The known, predetermined MIC for each strain is indicated on the plot using arrows.

512  
513  
514  
515

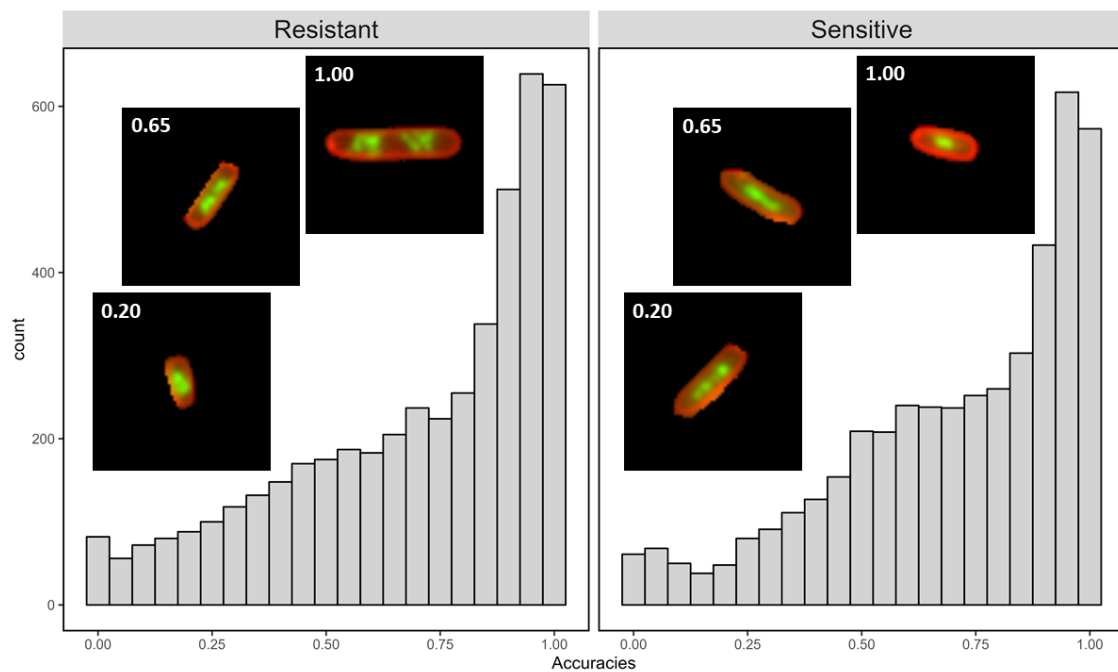

516  
517 **Figure 3. User accuracy varies by image for both resistant and sensitive cells.** Histograms of the user  
518 accuracy on images of *E. coli* treated at 10 mg/L for resistant and sensitive cells. Representative images  
519 of resistant and sensitive cells with low classification accuracy (0.20), intermediate classification  
520 accuracy (0.65) and high accuracy ( $\geq 0.95$ ) are shown. Both resistant and sensitive cells show a left  
521 skew, with many cells being classified correctly nearly always and some almost never. However, both  
522 populations also have many ambiguous images that were classified correctly by around half of the  
523 users.

524  
525  
526  
527

528

529

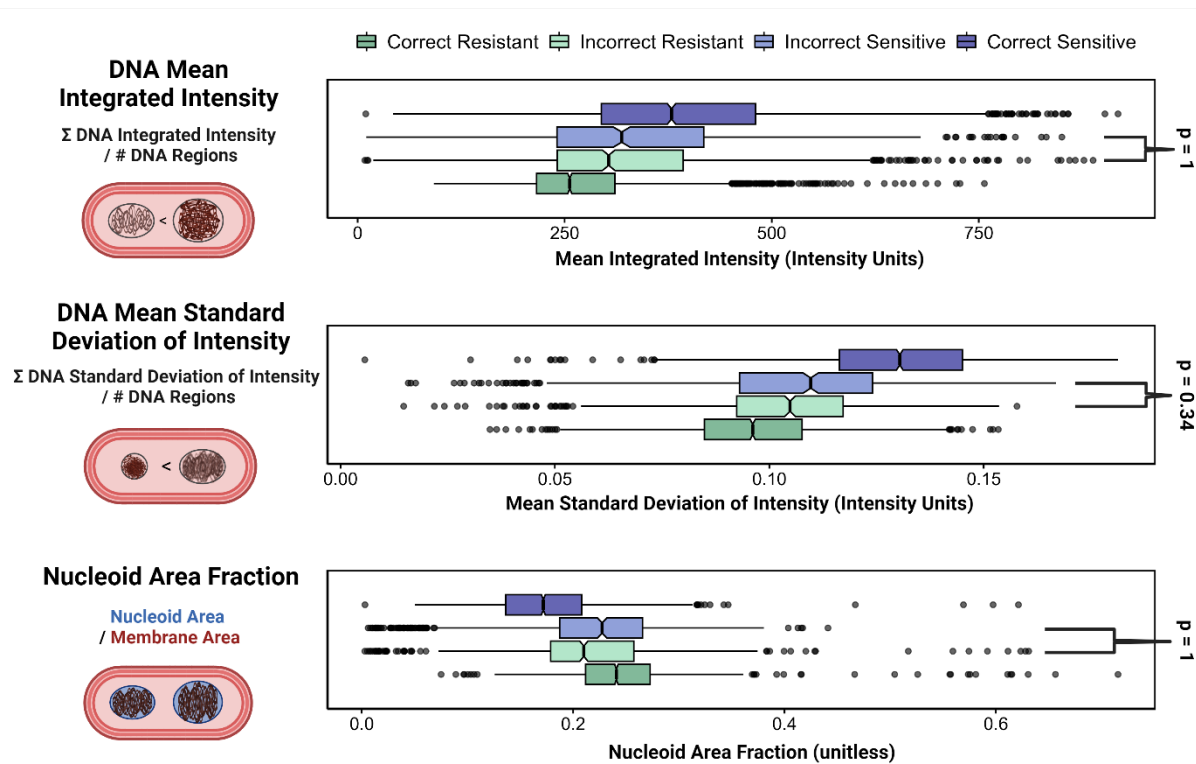

530

531 **Figure 4. Cells that were classified incorrectly have more similar features.** For three image features  
532 related to DNA heterogeneity and compaction, illustrations and definitions of which are shown above,  
533 the Incorrect Resistant and Incorrect Sensitive feature distributions are not significantly different, as  
534 shown in the box plots. A cell is called “Incorrect” if more than 50% of user classifications disagreed  
535 with the cell’s predicted classification, based on its MIC and the antibiotic treatment concentration.  
536 Notches are drawn showing the median value for each feature, and outliers are shown as spheres.  
537 The Bonferroni-corrected p-values were calculated for each pairwise comparison, and the features  
538 that were not significantly different are shown with brackets; all the other pairwise comparisons were  
539 significantly different with  $p < 0.0001$ .

540

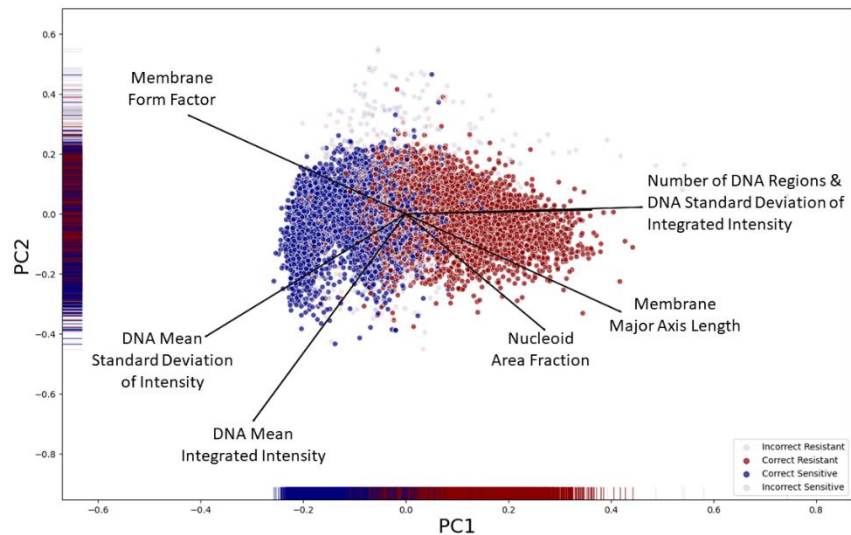

541

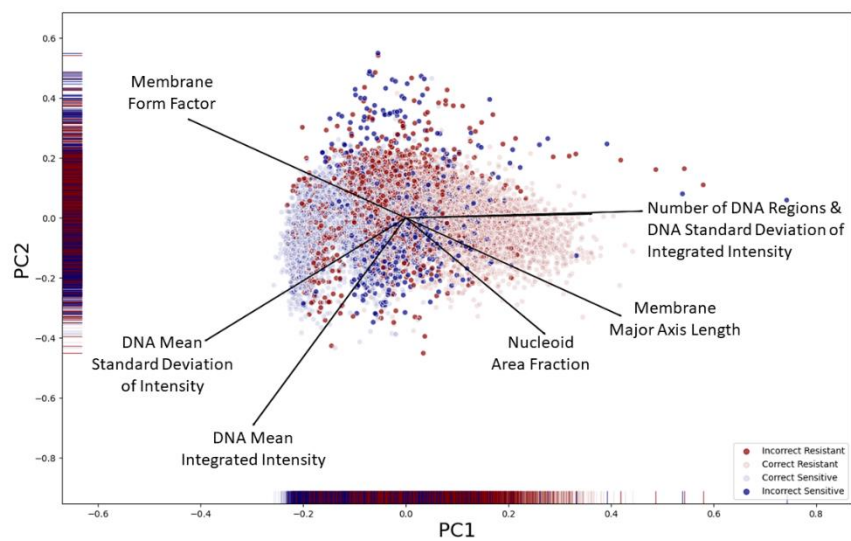

542

543 **Figure 5. Incorrectly classified images have intermediate phenotypes. Top:** In a 2-dimensional  
544 Principal Component Analysis, images of Resistant and Sensitive cells that were classified correctly  
545 more than 50% of the time (Correct Sensitive and Correct Resistant) cluster together, with some  
546 overlap. **Bottom:** Images that were classified incorrectly more than 50% of the time cluster near the  
547 centre of the principal component plot, with greater variance in the second principal component than  
548 correctly classified images.

549

550

551

552

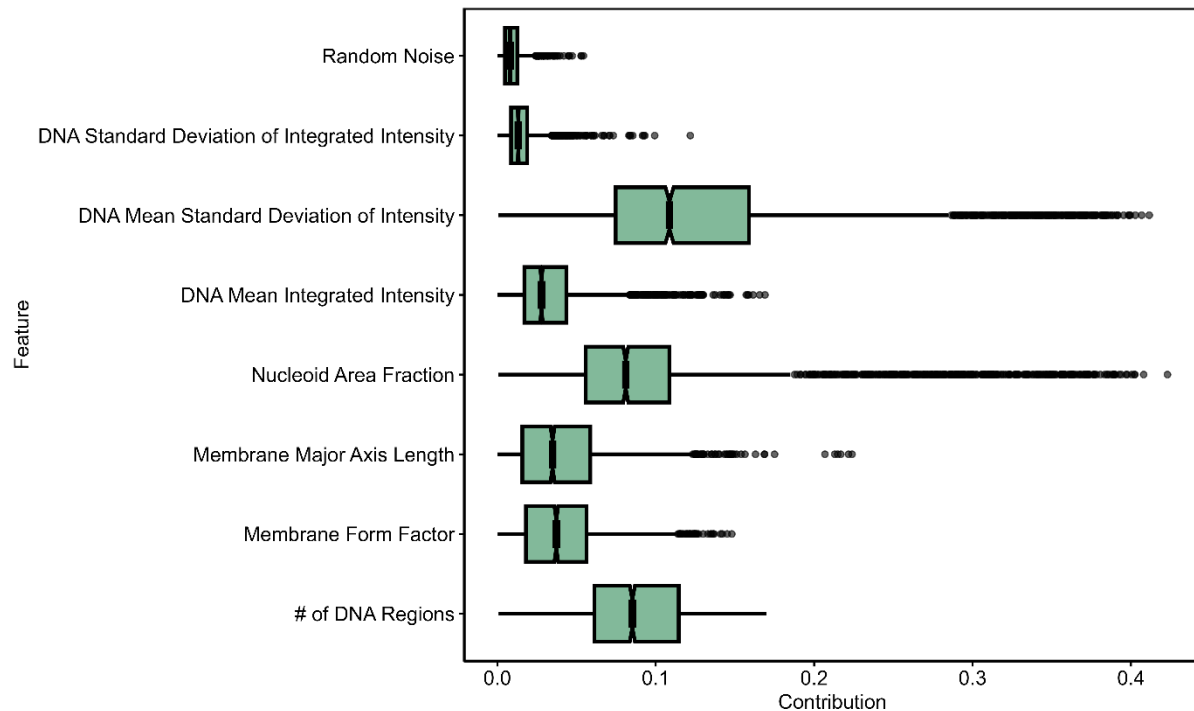

553

554 **Figure 6. Feature significance for all images measured by SHAP values.** The absolute value of the  
555 SHAP contribution for each feature is shown on a box plot, with  $p$ -values for each pairwise comparison  
556 with a Random Noise feature ( $t$ -test with Bonferroni correction for multiple comparisons). In order of  
557 their median SHAP contribution, the features are DNA Mean Standard Deviation of Intensity (0.109),  
558 Number of DNA Regions (0.085), Nucleoid Area Fraction (0.081), Membrane Form Factor (0.037),  
559 Membrane Major Axis Length (0.035), DNA Mean Integrated Intensity (0.028), DNA Standard  
560 Deviation of Integrated Intensity (0.013), and Random Noise (0.008). All the features are significantly  
561 different from Random Noise ( $p < 0.0001$ ), and all features are significantly different from each other  
562 ( $p < 0.0001$ ), except Membrane Major Axis Length and Membrane Form Factor (no significance).

563

564

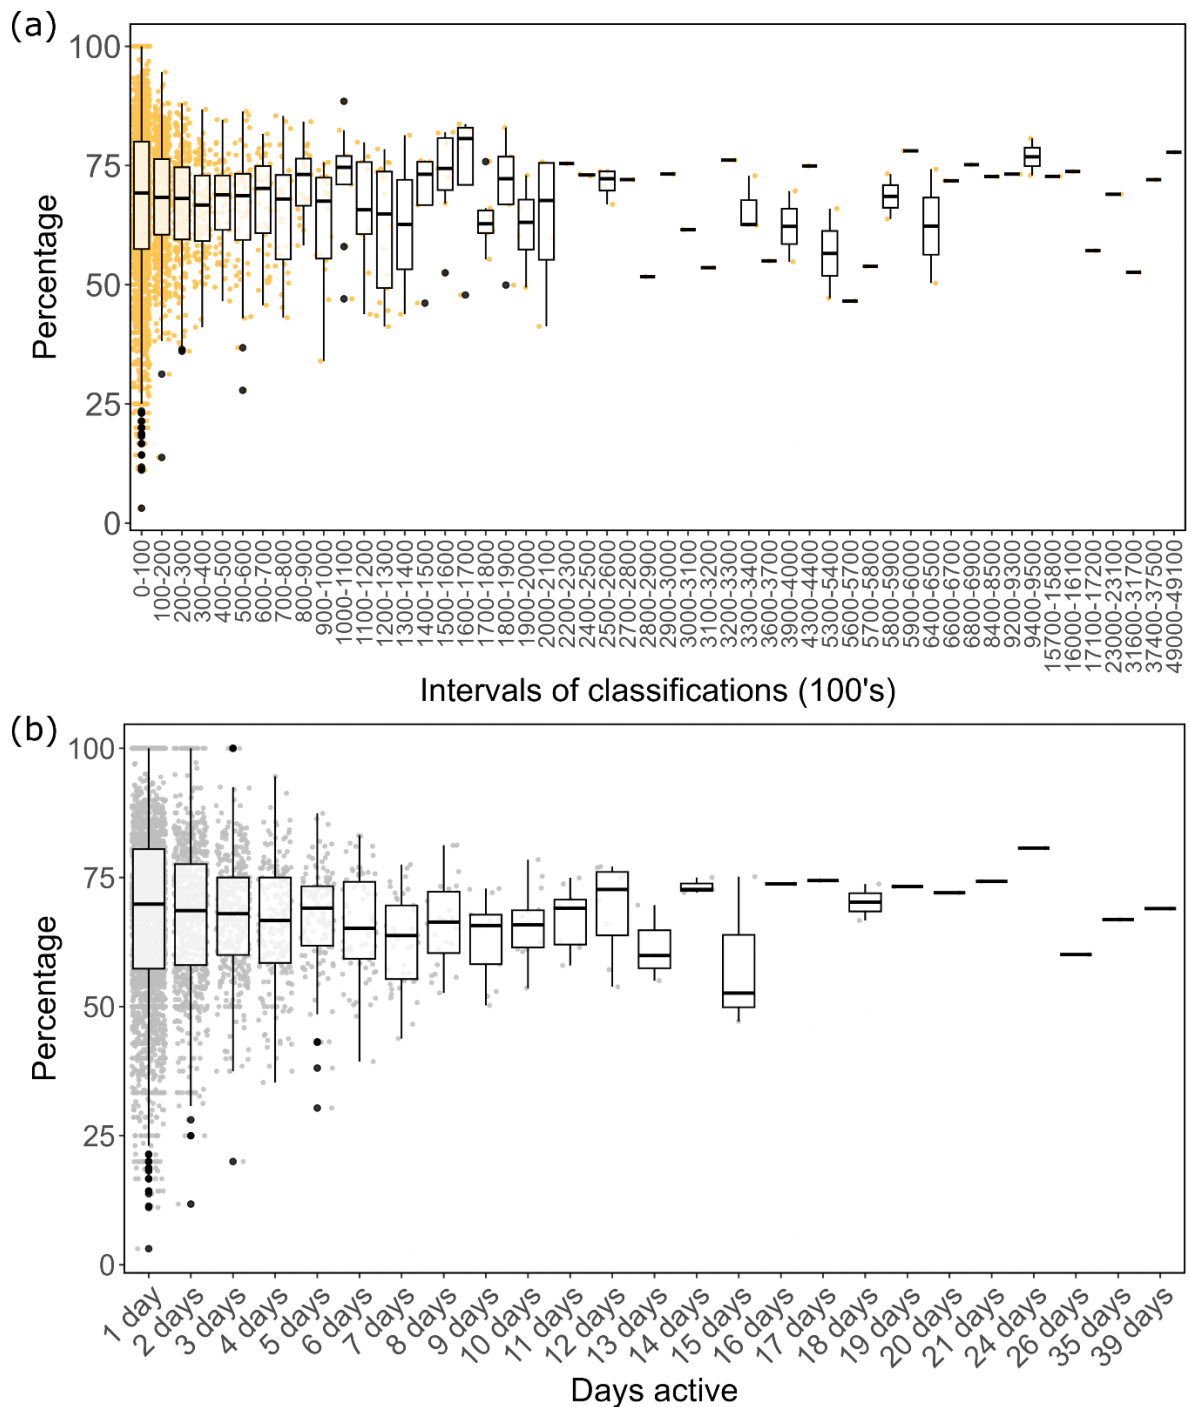

565

566 **Figure S1. Accuracy of users based on engagement.** Each boxplot represents the median image  
567 classification accuracy for users based on: (a) the total number of images they classified, or (b) total  
568 numbers of days they accessed the project. Boxplots highlight the middle 50% of data (IQR) with the  
569 median image classification accuracy for users shown in the central line.

570

571

572

573

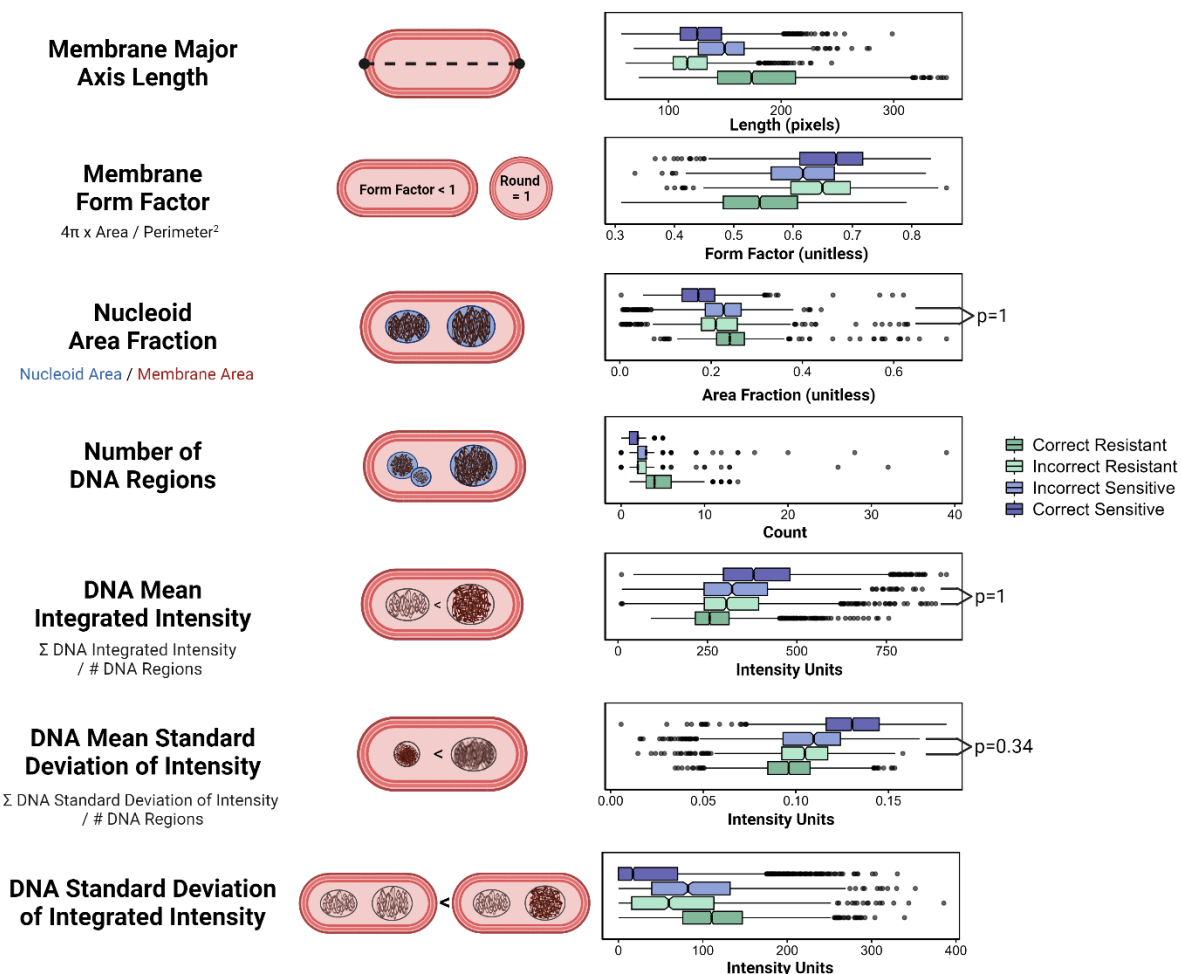

574

575 **Figure S2. The definition and distributions of the seven measurements used for image feature**  
 576 **analysis.** Seven measurements were chosen for their potential to reflect responses to ciprofloxacin  
 577 treatment. The features, with illustrative diagrams, are shown on the left; box plots of the feature  
 578 distributions for all cells are shown on the right, coloured by whether the cell was Sensitive or  
 579 Resistant and whether they were most often classified Correctly or Incorrectly. Notches indicate the  
 580 median value and outliers are plotted as black dots. The Membrane Major Axis Length and the  
 581 Membrane Form Factor measure cell size and cell shape, respectively. The Form Factor of a perfectly  
 582 round object is equal to 1, so most bacilli will have form factors <1. The Nucleoid Area Fraction is a  
 583 measurement of DNA compaction, DNA size, and cell size. The Number of DNA Regions detected by  
 584 CellProfiler also reflects DNA compaction and cell cycle stage. Other measurements of the nucleoid,  
 585 such as the Mean Integrated Intensity, Mean Standard Deviation of Intensity, and Standard Deviation  
 586 of the Integrated Intensity of DNA regions, measure the changes in DNA heterogeneity and  
 587 compaction as *E. coli* respond to ciprofloxacin. These measurements also capture the variations in  
 588 nucleoid morphology that can be seen within the same cell. For each feature, pairwise t-tests were  
 589 performed for the Correct Resistant, Incorrect Resistant, Incorrect Sensitive, and Correct Resistant

590 distributions. The p-value with Bonferroni correction for multiple comparisons is <0.0001 except  
591 where labelled.

592

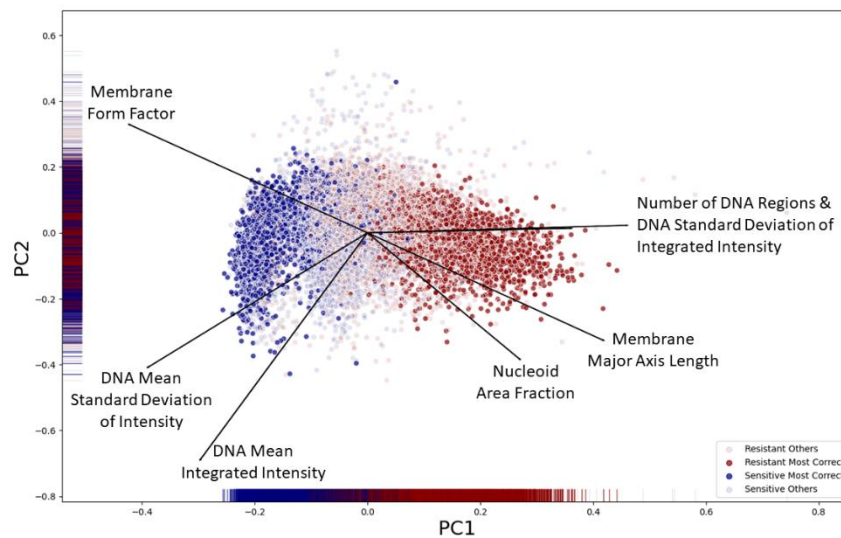

593

594 **Figure S3. Features distinguishing the most correctly classified cells.** Images were considered part of  
595 the Most Correct dataset if they were classified with greater than 94% accuracy (e.g. more than 19  
596 times out of 20). The most influential features for the first Principal Component are the Number of  
597 Nucleoids and the Nucleoid Standard Deviation of Integrated Intensity, a measure of the variation in  
598 nucleoid region brightness within the cell. The Most Correct Resistant cells and Most Correct Sensitive  
599 cells form distinct clusters, indicating that there are certain populations of cells that exhibit  
600 characteristic Resistant and Sensitive features, and are therefore likely to be classified accurately.

601

602

603

604

605

606

607

608

609

610

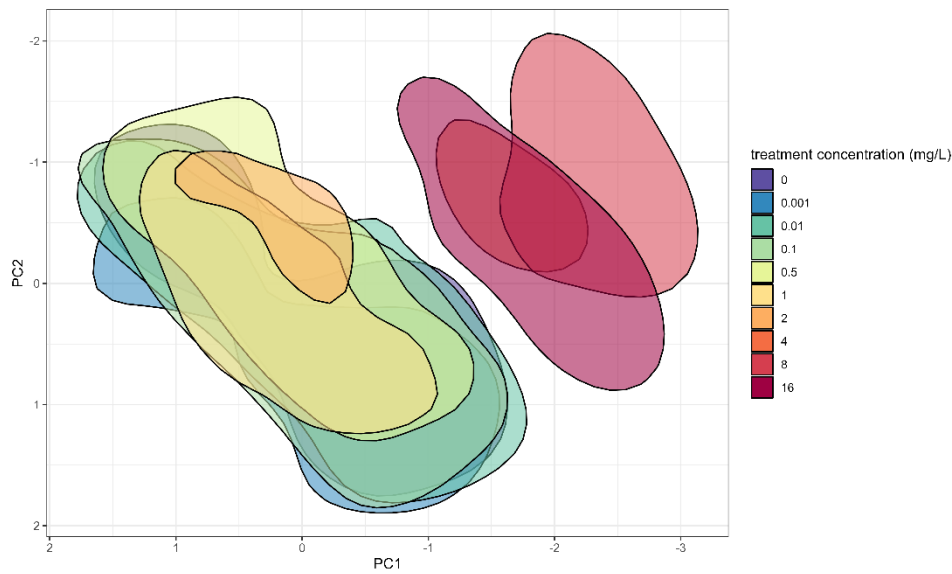

611

612 **Figure S4. Resistant *E. coli* treated with high concentrations of ciprofloxacin cluster together.** This  
613 ciprofloxacin-resistant clinical isolate (EC3; MIC = 0.5 mg/L) was treated at varying concentrations of  
614 ciprofloxacin for 30 minutes. This principal component analysis shows that features of cells treated at  
615 extremely high concentrations of ciprofloxacin (8-, 16-, and 32-times MIC; 4, 8, and 16 mg/L) form a  
616 separate cluster from those treated at lower concentrations, even when those concentrations are  
617 above the MIC. Geometric shapes are plotted with different colours to show the regions with point  
618 density above 0.07.
